# Supplementary material for: Bayesian log-normal deconvolution for enhanced in silico microdissection of bulk gene expression data
Source: PubMed Central journal article supplement (PMC8528834; doi:10.1038/s41467-021-26328-2), 2021-10-20
Supplement: 41467_2021_26328_MOESM3_ESM.pdf [file 41467_2021_26328_MOESM3_ESM.pdf]

### **Description of Additional Supplementary Files**

File Name: Supplementary Data 1

Description: Frequencies of cell types in the 2 PBMC cite-seq data, classified in 4 different levels. Also, cell type classification for the application to real PBMC mixtures (GSE107572) is indicated.
